# Supplementary material
Source: MDPI journal article supplement (https://www.mdpi.com/2073-4395/12/12/3228)
Supplement: s1 [file s1]

Supplementary Information for:

# Leaching of Sulfadiazine and Florfenicol in an Entisol of a Chicken-Raising Orchard: Impact of Manure-Derived Dissolved Organic Matter

Lanre Anthony Gbadegesin <sup>1,2</sup>, Xinyu Liu <sup>1,3</sup>, Xiangyu Tang <sup>1</sup>, Chen Liu <sup>1,\*</sup> and Junfang Cui <sup>1,\*</sup>

<sup>1</sup> Key Laboratory of Mountain Surface Processes and Ecological Regulation, Institute of Mountain Hazards and Environment, Chinese Academy of Sciences, Chengdu 610041, China

<sup>2</sup> International College, University of Chinese Academy of Sciences, Beijing 100049, China

<sup>3</sup> Faculty of Geosciences and Environmental Engineering, Southwest Jiaotong University, Chengdu 611756, China

\* Correspondence: chen1017@imde.ac.cn (C.L.); jfcui@imde.ac.cn (J.C.)

Number of tables: 2

Number of figures: 4

Number of pages: 7

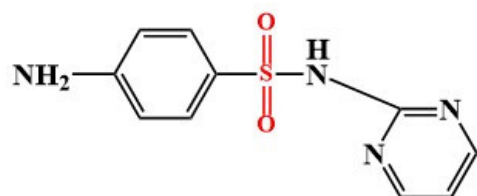**Sulfadiazine**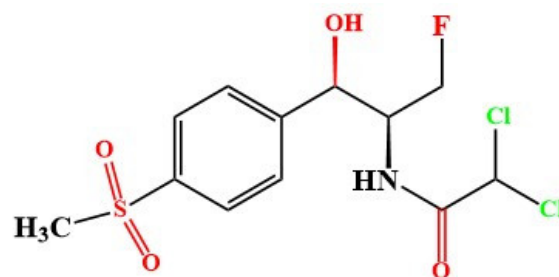**Florfenicol****Figure S1.** Chemical structure of sulfadiazine (SDZ) and florfenicol (FFC).

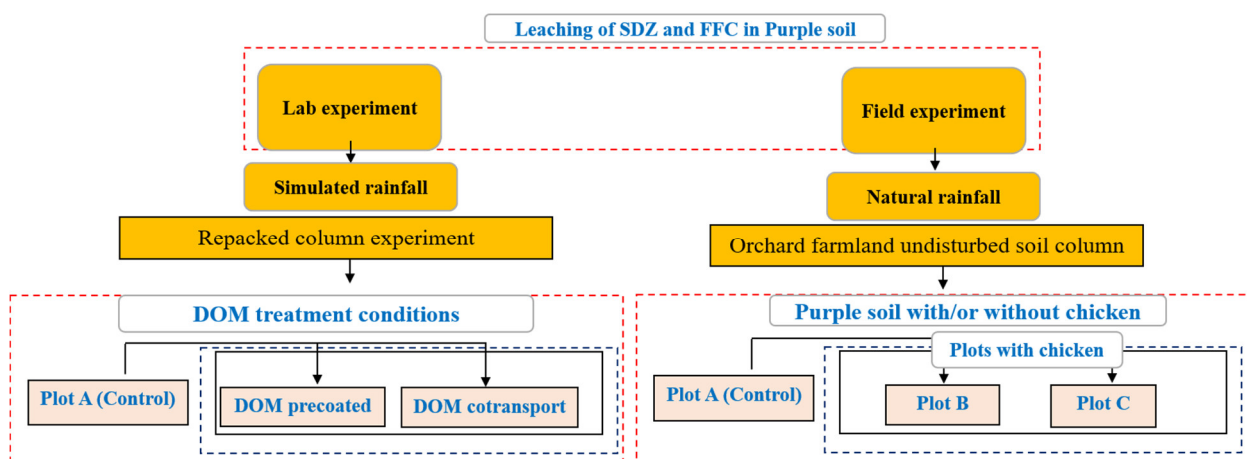

**Figure S2.** Experimental design of the antibiotic leaching experiment in the undisturbed field lysimeter and laboratory-repacked soil columns.

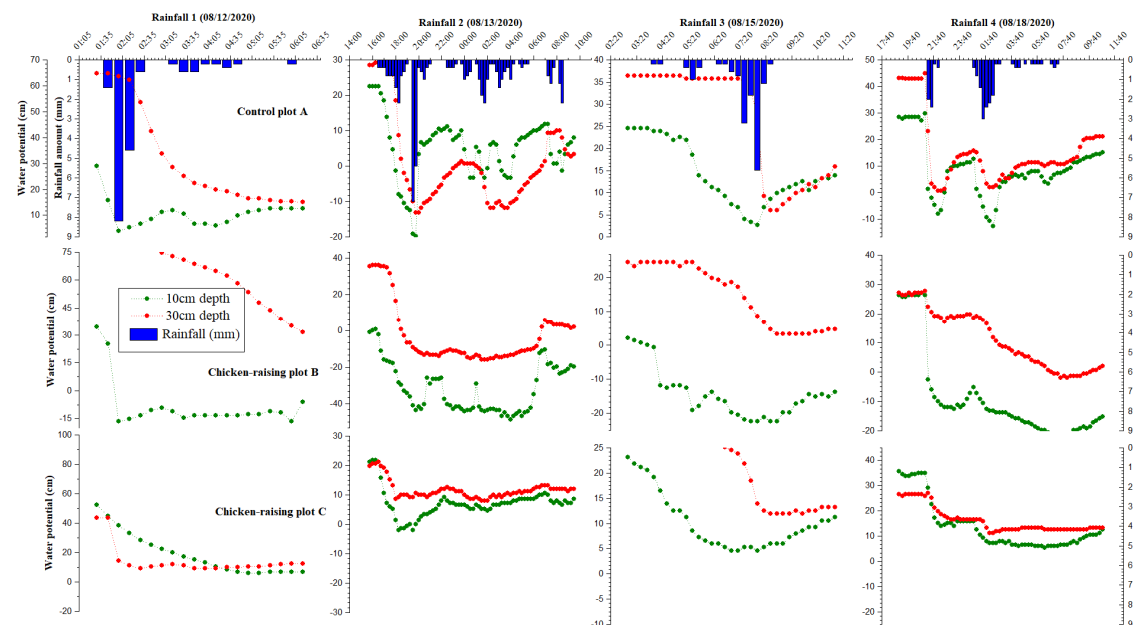

**Figure S3.** Temporal water potential at 10 cm and 30 cm depth continuously measured in the open-orchard field (without lysimeter) during the four rainfall events (I-IV) observed. Control plot A is plot without chicken-manure, plots B and C are manured plots (with free-ranging chickens). Redline with red-symbol represents water potential trend at 10 cm depth while greenline with green-symbol depicts water potential trend at 30 cm depth.

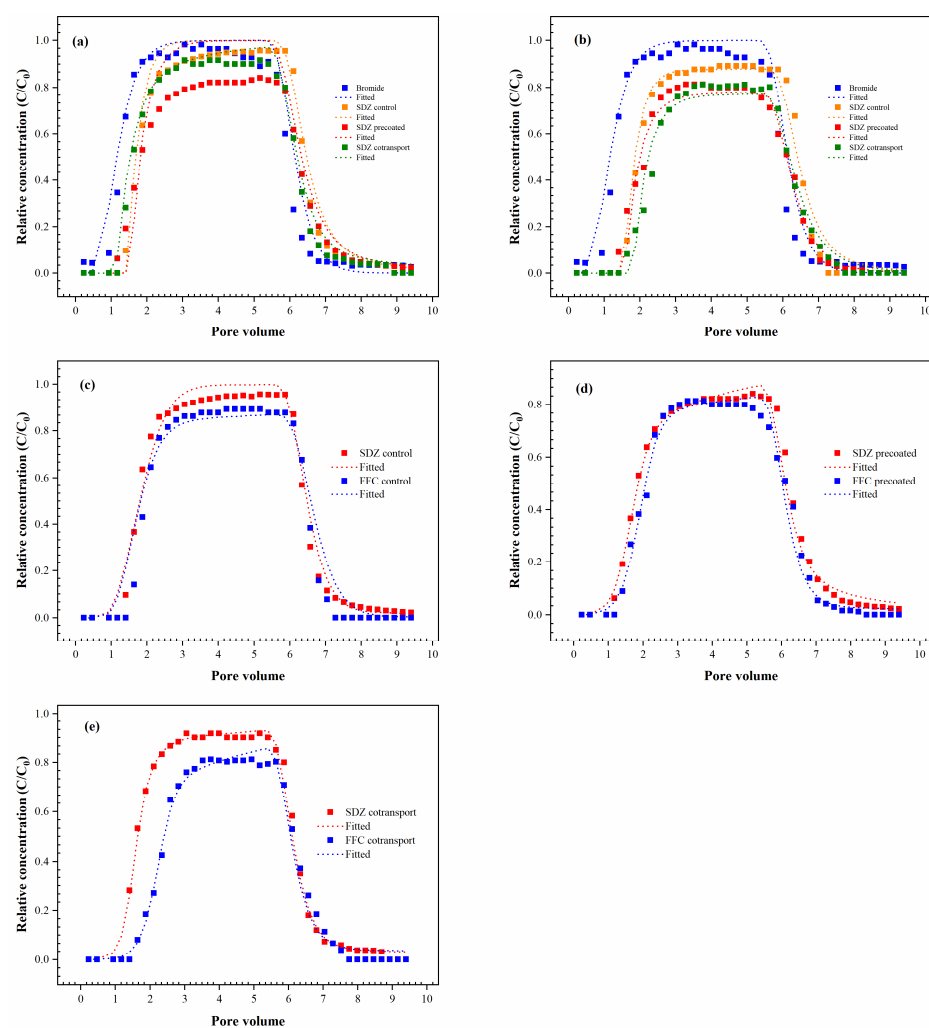

**Figure S4.** Breakthrough curves of Br compared with SDZ (a) and FFC (b) under DOM under various DOM treatment conditions fitted with two-site non-equilibrium adsorption model (TSM), and pairwise comparison of SDZ and FFC BTCs under control (c), DOM precoated (d), and cotransport (e) conditions fitted with two kinetic sites (TKS) model. Symbols and lines represent measurement and model fitting, respectively.

**Table S1.** Mean values of antibiotics, selected physiochemical properties, EEM PARAFAC components and DOC optical indices of lysimeter leachates under natural rainfall events (rainfall event 1–4).

| Rainfall events | Plots | FFC (mg/L)      | SDZ (mg/L)       | DOC (mg/L)       | pH (-)          | EC (µS/cm)         | Colloid (mg/L)  | PSD (<10 µm)     | C1 Fmax         | C2 Fmax         | C3 Fmax         | SUVA <sub>254</sub> | HIX            | SR              |
|-----------------|-------|-----------------|------------------|------------------|-----------------|--------------------|-----------------|------------------|-----------------|-----------------|-----------------|---------------------|----------------|-----------------|
| 1               | A     | 0.05<br>(±0.01) | 0.32<br>(±0.03)  | 59.86<br>(±0.11) | 8.13<br>(±0.12) | 578.00<br>(±2.10)  | 0.09<br>(±0.0)  | 17.34<br>(±1.10) | 4.24<br>(±0.10) | 1.13<br>(±0.22) | 1.14<br>(±0.0)  | 0.50<br>(±0.0)      | 0.90<br>(±0.0) | 0.69<br>(±0.0)  |
|                 | B     | 1.41<br>(±0.01) | 1.23<br>(±0.02)  | 16.47<br>(±1.20) | 7.57<br>(±0.30) | 537.00<br>(±4.10)  | 0.83<br>(±0.0)  | 44.38<br>(±2.11) | 2.94<br>(±0.0)  | 2.13<br>(±0.01) | 6.48<br>(±0.20) | 2.05<br>(±0.0)      | 0.66<br>(±0.0) | 1.35<br>(±0.0)  |
|                 | C     | 0.01<br>(±0.0)  | 0.09<br>(±0.0)   | 34.55<br>(±2.02) | 7.40<br>(±0.02) | 366.00<br>(±1.01)  | 1.14<br>(±0.01) | 1.91<br>(±0.0)   | 1.85<br>(±0.0)  | 1.29<br>(±0.01) | 5.23<br>(±0.10) | 0.72<br>(±0.02)     | 0.60<br>(±0.0) | 1.48<br>(±0.0)  |
| 2               | A     | 0.35<br>(±0.0)  | 4.41<br>(±0.03)  | 16.47<br>(±2.03) | 8.21<br>(±0.21) | 557.00<br>(±4.08)  | 0.05<br>(±0.0)  | 8.99<br>(±1.06)  | 4.55<br>(±0.0)  | 1.90<br>(±0.0)  | 2.68<br>(±0.0)  | 2.19<br>(±0.0)      | 0.85<br>(±0.0) | 0.77<br>(±0.0)  |
|                 | B     | 0.24<br>(±0.0)  | 4.91<br>(±0.22)  | 10.08<br>(±1.33) | 7.69<br>(±0.87) | 1726.00<br>(±4.06) | 0.81<br>(±0.0)  | 61.42<br>(±0.08) | 3.68<br>(±0.0)  | 3.17<br>(±0.0)  | 5.48<br>(±0.02) | 3.52<br>(±0.0)      | 0.76<br>(±0.0) | 1.11<br>(±0.0)  |
|                 | C     | 0.04<br>(±0.0)  | 5.12<br>(±0.42)  | 12.84<br>(±0.72) | 8.85<br>(±0.31) | 461.00<br>(±3.11)  | 0.31<br>(±0.0)  | 33.17<br>(±0.0)  | 1.88<br>(±0.0)  | 3.34<br>(±0.0)  | 2.45<br>(±0.0)  | 1.31<br>(±0.0)      | 0.80<br>(±0.0) | 1.55<br>(±0.0)  |
| 3               | A     | 0.04<br>(±0.0)  | 21.00<br>(±3.11) | 12.61<br>(±0.34) | 7.99<br>(±0.11) | 487.00<br>(±2.43)  | 0.01<br>(±0.0)  | 1.40<br>(±0.0)   | 4.25<br>(±0.0)  | 1.25<br>(±0.0)  | 0.68<br>(±0.0)  | 2.45<br>(±0.0)      | 0.92<br>(±0.0) | 0.60<br>(±0.0)  |
|                 | B     | 0.18<br>(±0.0)  | 9.75<br>(±1.20)  | 8.93<br>(±0.84)  | 7.23<br>(±0.65) | 1228.00<br>(±6.42) | 0.63<br>(±0.0)  | 24.22<br>(±3.10) | 3.50<br>(±0.0)  | 1.75<br>(±0.0)  | 0.93<br>(±0.0)  | 3.38<br>(±0.0)      | 0.90<br>(±0.0) | 0.44<br>(±0.0)  |
|                 | C     | 0.01<br>(±0.0)  | 4.46<br>(±0.0)   | 6.13<br>(±0.20)  | 8.85<br>(±0.66) | 461.00<br>(±4.22)  | 0.96<br>(±0.55) | 6.14<br>(±0.22)  | 2.00<br>(±0.0)  | 8.05<br>(±0.0)  | 2.48<br>(±0.0)  | 3.09<br>(±0.0)      | 0.85<br>(±0.0) | 2.19<br>(±0.0)  |
| 4               | A     | 0.01<br>(±0.0)  | 0.57<br>(±0.0)   | 5.02<br>(±0.0)   | 8.14<br>(±0.0)  | 596.00<br>(±2.82)  | 0.02<br>(±0.0)  | 1.82<br>(±0.0)   | 1.28<br>(±0.0)  | 0.41<br>(±0.0)  | 1.31<br>(±0.01) | 2.26<br>(±0.03)     | 0.76<br>(±0.0) | 1.26<br>(±0.01) |
|                 | B     | 0.10<br>(±0.0)  | 1.10<br>(±0.0)   | 10.65<br>(±0.44) | 7.42<br>(±0.85) | 1817.00<br>(±7.42) | 0.20<br>(±0.0)  | 0.00<br>(±0.0)   | 4.34<br>(±0.0)  | 1.81<br>(±0.0)  | 2.22<br>(±0.0)  | 3.65<br>(±0.0)      | 0.85<br>(±0.0) | 0.48<br>(±0.0)  |
|                 | C     | 0.02<br>(±0.0)  | 1.15<br>(±0.0)   | 4.12<br>(±0.32)  | 7.89<br>(±0.71) | 513.00<br>(±3.65)  | 1.26<br>(±0.0)  | 58.19<br>(±0.87) | 1.65<br>(±0.0)  | 1.34<br>(±0.0)  | 0.63<br>(±0.0)  | 3.14<br>(±0.0)      | 0.89<br>(±0.0) | 0.71<br>(±0.0)  |

Plot A represents control plot (without manure), B and C are manured plots, FFC and SDZ represent florfenicol and sulfadiazine; respectively, C1, C2, and C3 are PARAFAC components, HIX: Humification index, SR: Slope Ratio, SUVA<sub>254</sub>: Specific UV-visible absorbance, PSD<10 µm sum of particle size distribution <10 µm.

**Table S2.** Fitting parameters of two-sites chemical nonequilibrium model coupled with Freundlich isotherm.

| Antibiotics | Column       | $f$                | $k_f$            | $n$                 | $\alpha$ (min <sup>-1</sup> ) | R <sup>2</sup> | RMSE     | EM%   |
|-------------|--------------|--------------------|------------------|---------------------|-------------------------------|----------------|----------|-------|
| SDZ         | Control      | 0.35<br>(±0.07)    | 0.63<br>(±0.05)  | 0.99<br>(±0.15)     | 6.05E-04<br>(±0.00)           | 0.988          | 0.05272  | 95.70 |
| SDZ         | Precoated    | 0.09<br>(±4.7E-03) | 2.93<br>(±0.14)  | 1.35<br>(±0.12)     | 2.80E-04<br>(±7.62E-06)       | 0.995          | 1.46E-02 | 84.07 |
| SDZ         | Co-transport | 0.13<br>(±5.6E-03) | 8.29<br>c)       | 11.1<br>(±0.30)     | 2.82E-04<br>(±5.4E-05)        | 0.995          | 1.31E-02 | 91.64 |
| FFC         | Control      | 0.06<br>(±2.9E-03) | 9.74<br>(±0.66)  | 2.93<br>(±7.20E-02) | 9.17E-05<br>(±3.54E-04)       | 0.979          | 6.97E-02 | 89.21 |
| FFC         | Precoated    | 0.10<br>(±0.05)    | 13.04<br>(±1.30) | 8.44<br>(±0.49)     | 3.03E-04<br>(±1.24E-04)       | 0.983          | 2.38E-02 | 81.32 |
| FFC         | Co-transport | 0.22<br>(±0.01)    | 33.19<br>(±1.94) | 30.97<br>(±1.94)    | 4.45E-04<br>(±3.24E-05)       | 0.978          | 5.26E-02 | 81.13 |

$f$ : fraction of adsorption sites available for instantaneous sorption,  $\alpha$ : first-order coefficient rate for two sites non-equilibrium adsorption.  $k_f$ : Freundlich coefficient,  $n$ : Freundlich exponent,  $\alpha$ , kinetic sorption rate;  $\lambda$ : dispersivity. EM: Eluted mass (calculated). R<sup>2</sup>: coefficient of determination. RMSE: root means square error. 95% confidence intervals are given in brackets. 95% confidence intervals are given in brackets.
